# Supplementary material
Source: MDPI journal article supplement (https://www.mdpi.com/1099-4300/21/11/1127)

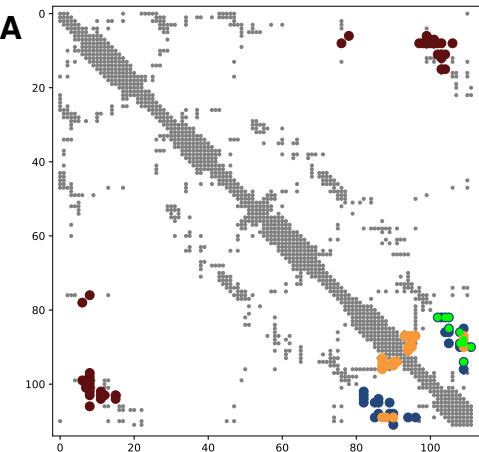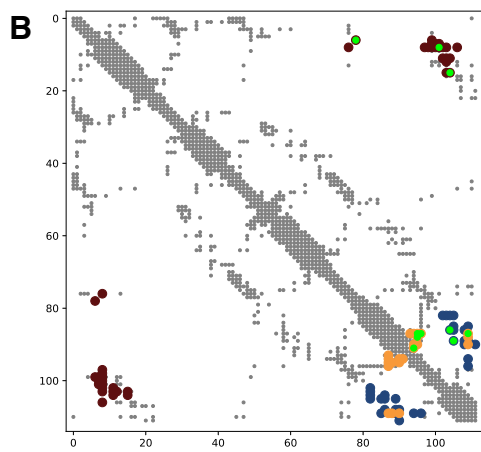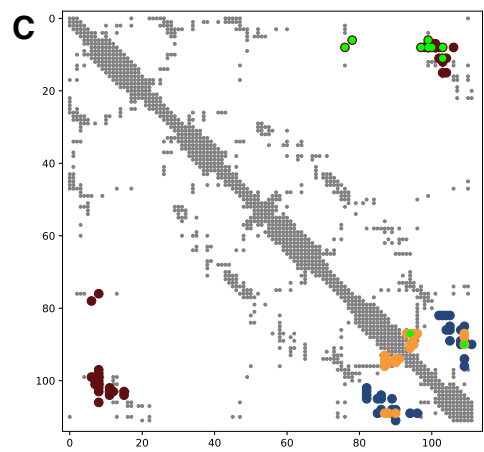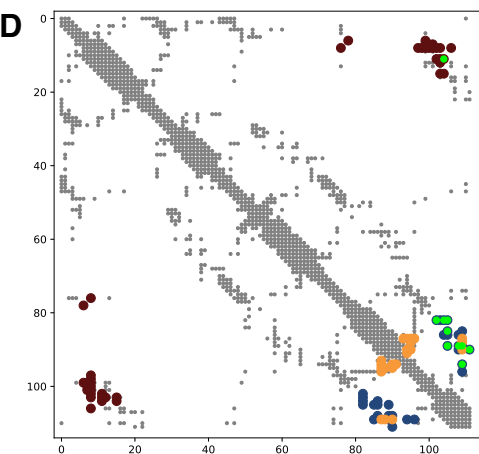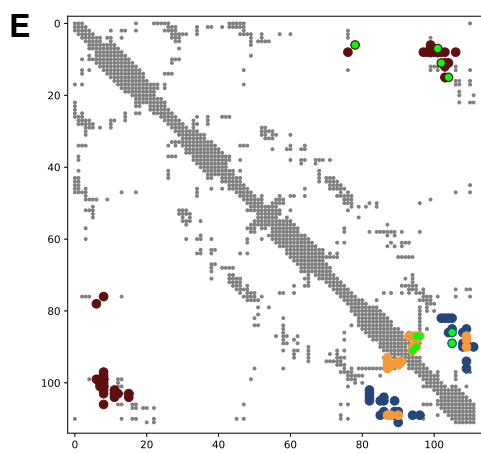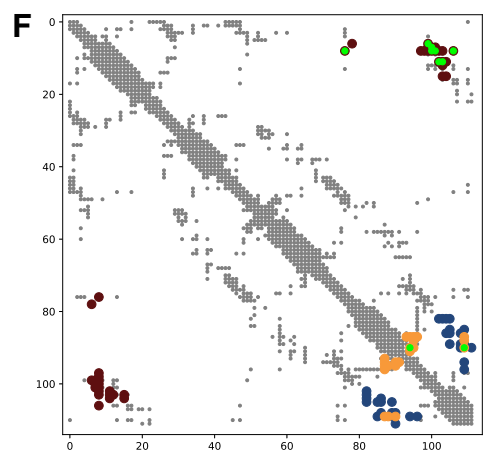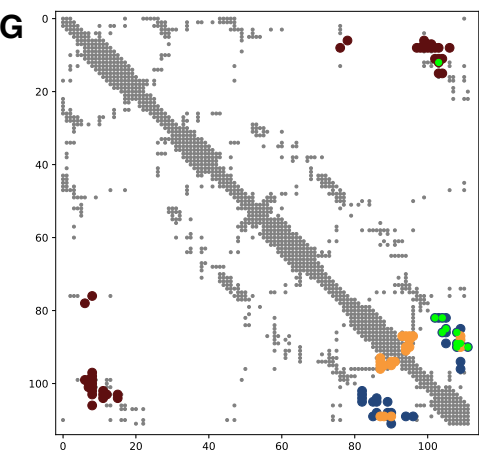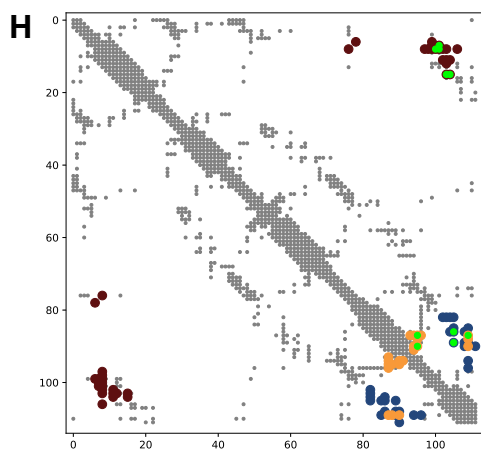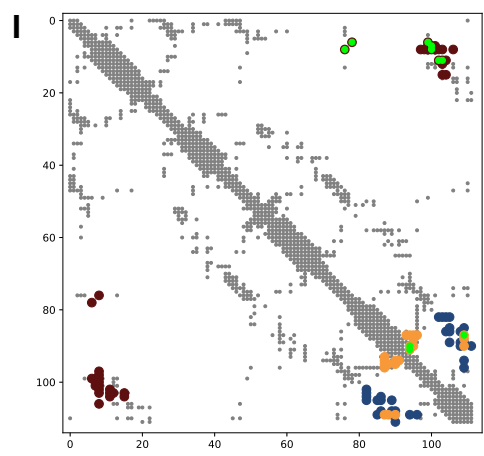

Supplement: s1 [file s1]

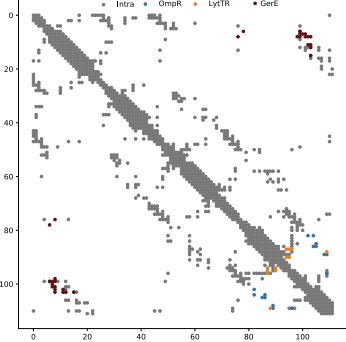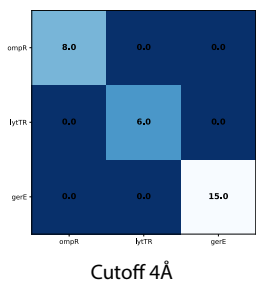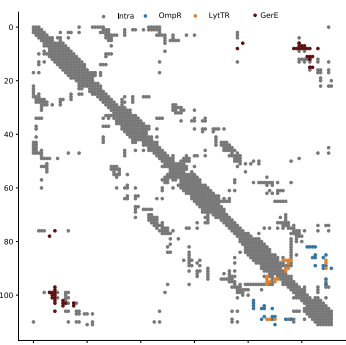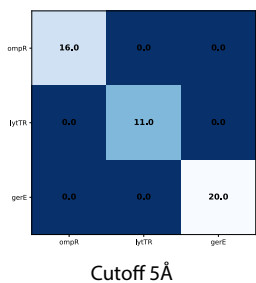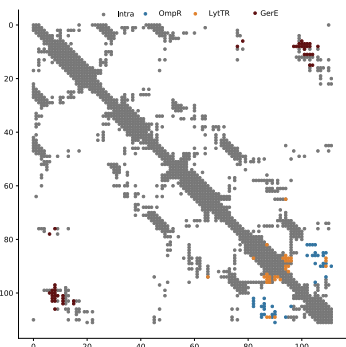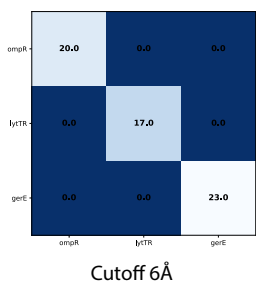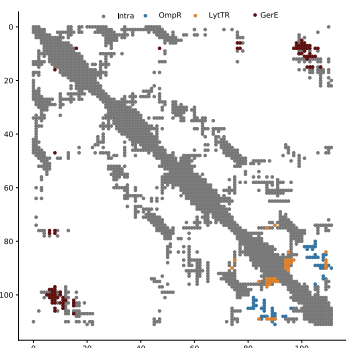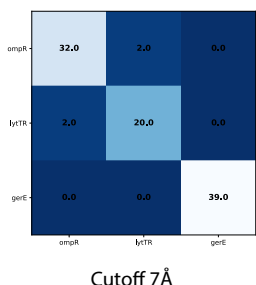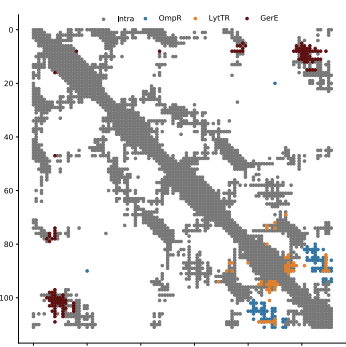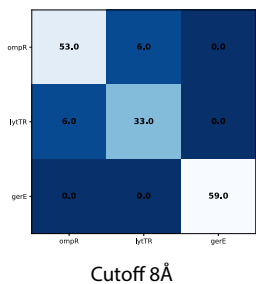

Supplement: s1 [file s1]

## $\alpha$ - Interface

**A**

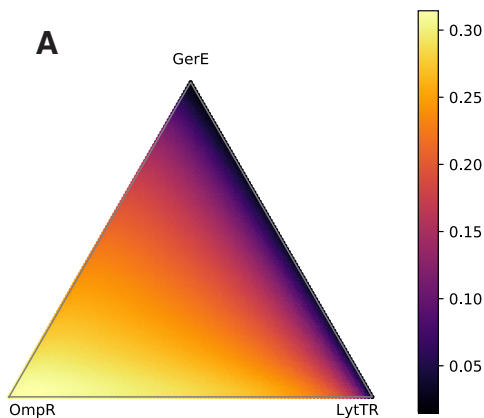

## $\beta$ - Interface

**B**

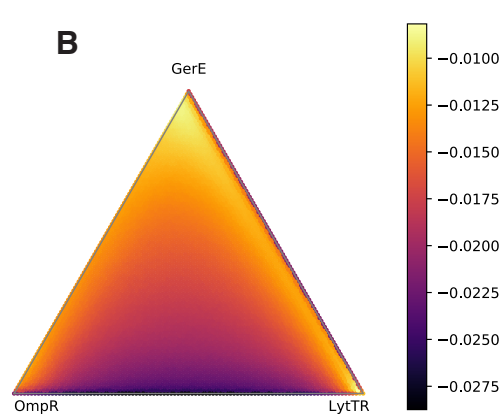

## $\gamma$ - Interface

**C**

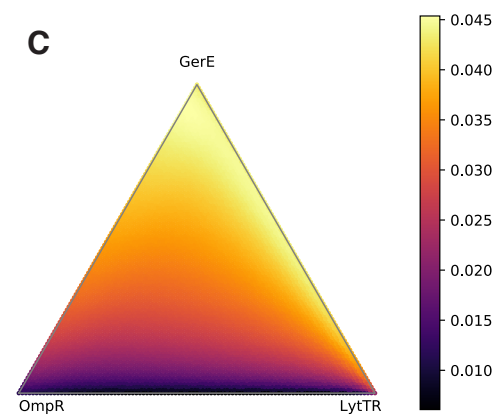

**D**

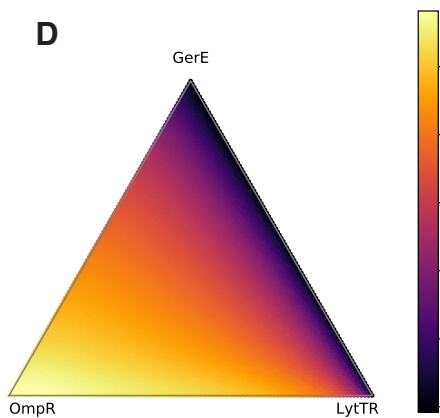

**E**

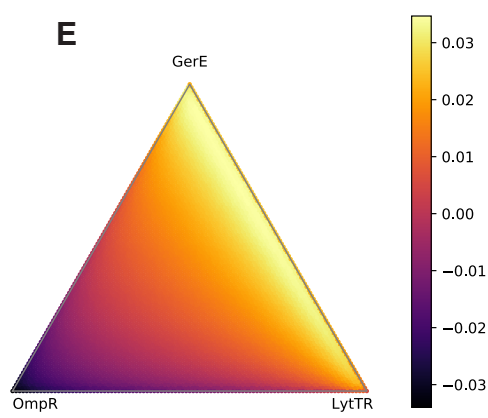

**F**

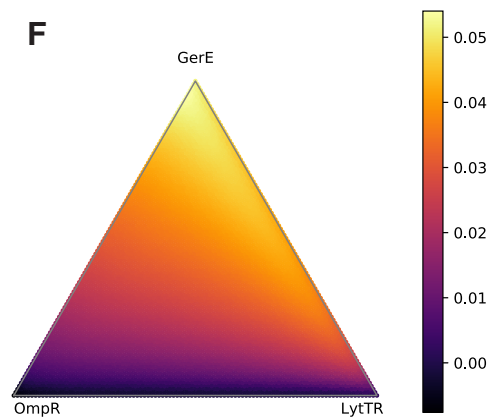

**G**

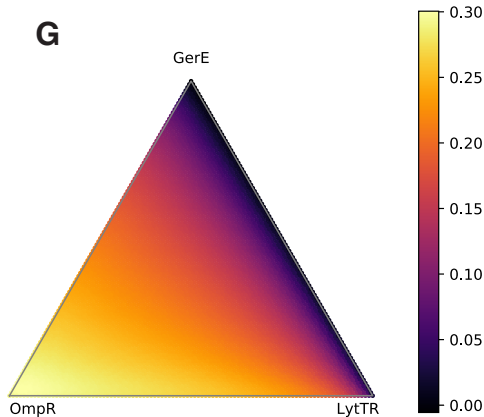

**H**

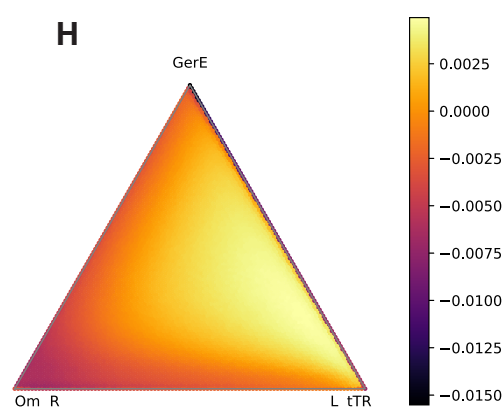

**I**

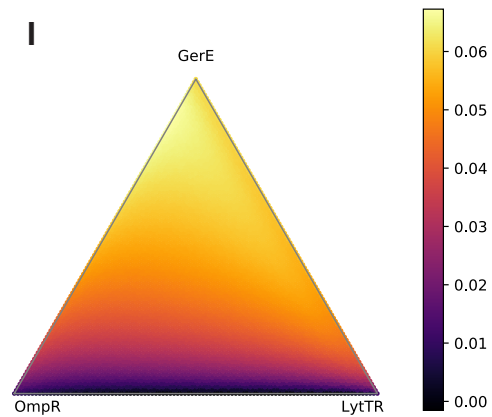

Supplement: s1 [file s1]
